# Supplementary material
Source: PubMed Central journal article supplement (PMC9857565)
Supplement: jama-e2222974-s002.pdf [file jama-e2222974-s002.pdf]

## Data Sharing Statement

Everhart. Association Between Regulatory Submission Characteristics and Recalls of Medical Devices Receiving 510(k) Clearance. *JAMA*. Published January 10, 2023.  
doi:10.1001/jama.2022.22974

### Data

**Data available:** No
